# Supplementary material
Source: publisher figshare collection journal article supplement (https://karger.figshare.com/ndownloader/files/27540926)
Supplement: Supplementary file 1 [file 27540926]

1. **“Astrocytoma” OR “glioma” OR” glioblastoma” OR” glioblastoma multiforme” OR “GBM” AND” radiomics”.**
2. **“Astrocytoma” OR “glioma” OR” glioblastoma” OR” glioblastoma multiforme” OR “GBM” AND” AI”**
3. **“Astrocytoma” OR “glioma” OR” glioblastoma” OR” glioblastoma multiforme” OR “GBM” AND” artificial intelligence”**
4. **“Astrocytoma” OR “glioma” OR” glioblastoma” OR” glioblastoma multiforme” OR “GBM” AND” Computer aided diagnosis ”**
5. **“Astrocytoma” OR “glioma” OR” glioblastoma” OR” glioblastoma multiforme” OR “GBM” AND” radiogenomics ”**
6. **(((glioma[Title]) ) OR (astrocytoma[Title])) AND (radiomics)**
7. **(((glioma[Title]) ) OR (astrocytoma[Title])) AND (radiogenoimc)**
